# Supplementary material
Source: Springer Nature journal article supplement (https://www.springermedizin.de/resource/supplementary/12913_2006_493_MOESM5_ESM.pdf/9534868)
Supplement: MOESM5 [file 9534868]

| Condition                                 | Pneumonia                                         | Diarrhoea             | HIV/AIDS                                      | HIV/AIDS                                | HIV transmission from mother to child       | Tuberculosis + HIV   | Tuberculosis         | Malaria                                    | Malaria              |
|-------------------------------------------|---------------------------------------------------|-----------------------|-----------------------------------------------|-----------------------------------------|---------------------------------------------|----------------------|----------------------|--------------------------------------------|----------------------|
| <b>Intervention</b>                       | Integrated Management of Childhood Illness (IMCI) | Safe water (software) | Highly active anti-retroviral therapy (HAART) | Voluntary Counselling and Testing (VCT) | Single dose Nevirapine (targeted treatment) | Community based DOTs | Community based DOTs | Intermittent treatment of pregnant mothers | Impregnated bed nets |
| <b>Age (years)</b>                        | < 5                                               | < 5                   | 19 - 45                                       | 19 – 45                                 | < 2                                         | 19 – 45              | 15 – 44              | 15 – 49                                    | < 5                  |
| <b>Area of residence</b>                  | Poor (ventilation)                                | Poor                  | Urban                                         | Urban                                   | Urban                                       | Urban                | Urban                | Equal                                      | Equal                |
| <b>Household income</b>                   | Poor                                              | Poor                  | Equal                                         | Equal                                   | Equal                                       | Poor                 | Poor                 | Equal                                      | Equal                |
| <b>Gender</b>                             | Equal                                             | Equal                 | Women > men                                   | Women > men                             | Equal                                       | Men > women          | Men > women          | Women                                      | Equal                |
| <b>Political voice or pressure groups</b> | Low                                               | Average               | High                                          | High                                    | High                                        | Average              | Average              | Average                                    | Average              |
